# Supplementary material for: Fine mapping of type 1 diabetes regions Idd9.1 and Idd9.2 reveals genetic complexity
Source: PubMed Central journal article supplement (PMC3824839; doi:10.1007/s00335-013-9466-y), 2013-08-11
Supplement: 335_2013_9466_MOESM1_ESM.pdf [file 335_2013_9466_MOESM1_ESM.pdf]

Supplemental table Ia: Markers that define the boundary of each line

| <b>Line Number</b> | <b>Proximal out marker</b> | <b>Proximal in marker</b> | <b>Distal in marker</b> | <b>Distal out marker</b> |
|--------------------|----------------------------|---------------------------|-------------------------|--------------------------|
| Line 1104          | D4Mit27                    | D4Mit28                   | D4Mit42                 | rs32942538               |
| Line 905           | rs31864219                 | rs3676600                 | D4Mit42                 | rs32942538               |
| Line 1565          | rs31864219                 | rs3676600                 | D4Mit339                | rs27543340               |
| Line 2790 Proximal | rs31864219                 | rs3676600                 | D4Mit339                | rs27543340               |
| Line 2790 Distal   | D4Mit127                   | AL606914(TGCA)            | D4Mit42                 | rs32942538               |
| Line 3571 Proximal | rs31864219                 | rs3676600                 | BqH15-T7                | rs6361251                |
| Line 3571 Distal   | D4Mit127                   | AL606914(TGCA)            | D4Mit42                 | rs32942538               |
| Line 1106          | D4Mit127                   | AL606914(TGCA)            | D4Mit42                 | rs32942538               |
| Line 928           | rs6355453                  | rs13477984                | D4Mit42                 | rs32942538               |
| Line 1105          | rs27604152                 | rs27628286                | D4Mit42                 | rs32942538               |
| Line 1566          | CD30 distal 5              | AL606963TA                | Clstn1-RE               | Pik3cd-RE                |
| Line 9374          | CD30 distal 5              | AL606963TA                | Chr4-147.563            | Chr4-147.582             |
| Line 6353          | rs45830432                 | rs27615497                | rs32076285              | rs32566241               |
| Line 930           | rs45830432                 | rs27615497                | rs13478063              | rs32942538               |

Supplemental table Ib: Markers used for genotyping mice in this study

| Marker         | Position in Ensembl (GRCm38) | Forward                  | Reverse                | Size | Comments                                     |
|----------------|------------------------------|--------------------------|------------------------|------|----------------------------------------------|
| CD30 distal 5  | 145.378 Mb                   | ATGGAGAGAGTGAGGCAGGA     | CTGTTCCCAGGTAGCCTTGA   | 200  | microsatellite - agarose marker              |
| AL606963TA     | 145.667 Mb                   | ATACCCAAAGCACCCCTTGTG    | GGTAGACTGCTCCAATGAAAGG | 160  | microsatellite - ABI3730 capillary sequencer |
| Chr4-147.563   | 148.189 Mb                   | GGGCTAGAATGGTCACTGGA     | GCAGAGACTCAAAGGCCAAT   | 181  | microsatellite - agarose marker              |
| Chr4-147.582   | 148.208 Mb                   | CATCAACCCCAGGACAAAAG     | AACGGGTTGATCCAGTCTGT   | 186  | microsatellite - agarose marker              |
| rs45830432     | 148.450 Mb                   | CCATGCTAGTACCCCTGCACA    | ACTCACAGGGCGTACTCGAT   | 169  | RFLP NOD cuts with Hpych4IV                  |
| rs27615497     | 148.458 Mb                   | ACTGTCAGGCACCTTGTTCC     | AGGCTGAACTGCAAACCTGCT  | 159  | RFLP cut with AluI                           |
| rs32076285     | 148.769 Mb                   | ACAGCAGAGTGAGCTGGACA     | CACCTCATTGCTGAGGGTTT   | 160  | RFLP B10 cuts with Hpych4II                  |
| rs32566241     | 148.872 Mb                   | CTTTGAATCCCATCCCCTTGA    | GAAGCCCATGGAGAAGCTGAG  | 112  | RFLP NOD cuts with BSR1                      |
| Cln1-RE        | 149.581 Mb                   | GGGTAGCATCATCAGGTCACCT   | GGGCTCCAACAACAACTTCTC  | 179  | RFLP cut with HpyCH4IV                       |
| Pik3cd-RE      | 149.724 Mb                   | ACGCGCACTAATCCAACC       | AGCTGCTCCTCTGTCTCTGTG  | 107  | RFLP cut with AciI                           |
| AL606914(TGCA) | 149.953 Mb                   | ATGAAGGCTTGGTGTCTCTTG    | AGAAAGCCAACCTCCCTCCAG  | 205  | microsatellite - ABI3730 capillary sequencer |
| BqH15-T7       | 128.688 Mb                   | AGCCTGTGTTACCCTGCAAT     | CCCTCTCTCTTCTGACAAA    | 185  | microsatellite - ABI3730 capillary sequencer |
| rs13477984     | 131.623 Mb                   | CATGTGGTTCTGCTGCTGTC     | CCTGGGGTGGCTGTGTATAA   | 152  | SNP to sequence                              |
| rs13478063     | 153.325 Mb                   | GGAATGCCACTCCTCAGAGA     | AACAGAACAGGGAGCCACAG   | 84   | RFLP cut with HPYCH4III                      |
| rs27543340     | 134.937 Mb                   | CTGGGGTCTGAGAACCTGAA     | TTCCCTGGATCACTGCTTTC   | 113  | RFLP cut with HAEIII                         |
| rs27604152     | 141.456 Mb                   | CGACTCTGCACAGCATTGAT     | CCTGAGGGAAGCACTGTAGC   | 98   | RFLP cut with HpyAv                          |
| rs27628286     | 141.706 Mb                   | TTTCTCACCTGGGCTCACTC     | ACCTTTCTTGCACGTTTTCC   | 114  | RFLP cut with TaqI                           |
| rs31864219     | 116.875 Mb                   | GCAGGTGATAATCATCCCTTACTT | GCACAAGTACGCCTGTGTGT   | 107  | SNP to sequence                              |
| rs32942538     | 154.341 Mb                   | TTTTGGTTTGGTGGTGAGGT     | GTCAAGGCTGAGCCAAAGTC   | 90   | RFLP cut with MspI                           |
| rs3676600      | 119.767 Mb                   | AAACCAGGGTTCGTGCTATG     | GTGACACCATGGCTCACAGA   | 347  | SNP to sequence                              |
| rs6355453      | 131.080 Mb                   | GGACTCGAGGGACACACTTC     | AGGAGTGGCTGGTCACAGAG   | 100  | SNP to sequence                              |
| rs6361251      | 128.870 Mb                   | GAGGCAGATTTTGCACAGTTC    | GGCCCACAATCTGCTTTTTTA  | 207  | SNP to sequence                              |

Supplemental table Ic: Primers used for gene expression analysis

| <b>Gene</b>       | <b>Exons</b> | <b>Forward primer</b>      | <b>Reverse primer</b>     |
|-------------------|--------------|----------------------------|---------------------------|
| <i>Akr1el</i>     | 4-5          | ACCCAGTCACACCAGCTTTC       | CCTCAAACCAGGCTTATCCA      |
| <i>Akr1el</i>     | 8-9          | TCCGATTCAGATCCAAAGG        | GGCTGAGGAGTTCCTCCATA      |
| <i>Rex2-201*</i>  | 1-3          | CGGAGGAATGGGAATGTCT        | GTGCTGTGTGTCTTGTTCCAA     |
| <i>Rex2-202**</i> | 5-6          | TTGCAGGACATTGTACATGGAT     | GTGCTGTGTGTCTTGTTCCAA     |
| <i>Ccdc28b</i>    | 2-3          | ACTCCCTCATTGCCATCAC        | CTGTCACCTCTGTCAGGAAGG     |
| <i>Ptp4a2</i>     | 2-4          | AACTCACAACCCACCAATG        | AACGGCCAATCTAGAACGTG      |
| <i>Ptp4a2</i>     | 3-4          | CCAATGCGACTCTCAACAAG       | AACGGCCAATCTAGAACGTG      |
| <i>Ptp4a2</i>     | 4-6          | TGTGTTGCAGTGCATTGTGT       | AAAGCAGCTGTTTGGAAATTGA    |
| <i>Rbbp4</i>      | 3-4          | TGTCCTGGGAACACACACAT       | TGACAGAACCAAAACCTCCA      |
| <i>Rbbp4</i>      | 6-7          | CAGCAGTAGTGGAGGACGTG       | AGTGGCTTGGCTTGGGAAGTA     |
| <i>S100pbb</i>    | 2-3          | AGCGGGAGTTGAAACCTTTT       | AGGCATTGCTTTTAGGCAGA      |
| <i>Zbtb8a</i>     | 4-5          | GGTTCAGCAGGCTAGACCAT       | GGTTCCTTCCTGCACCACT       |
| <i>Zbtb8a</i>     | 3-4          | TCCCAGTCTGAAGAGCAGGT       | ATGGGCATTTGAACCGAAG       |
| <i>β-actin</i>    | 5-6          | TGGAATCCTGTGGCATCCATGAAACC | TAAAACGCAGCTCAGTAACAGTCCG |
| <i>β2m</i>        | 2-4          | AGACTGATACATACGCCTGCAG     | GCAGGTTCAAATGAATCTTCAG    |

\*Also primes Gm13138-001 and Gm13138-202

\*\*Also primes Gm13138-201
