# Supplementary material for: Fine mapping of type 1 diabetes regions Idd9.1 and Idd9.2 reveals genetic complexity
Source: PubMed Central journal article supplement (PMC3824839; doi:10.1007/s00335-013-9466-y), 2013-08-11
Supplement: 335_2013_9466_MOESM3_ESM.pdf [file 335_2013_9466_MOESM3_ESM.pdf]

Supplemental Table 3a. Consequences of SNP variations in protein-coding genes between NOD and C57BL/6 genomes in a portion of the *Idd9.1* region, 129.495-129.808 Mb.

| Gene    | Position m38 | C57BL/6 | NOD/ShiLtJ | AA change | Codon change     | Consequence                             |
|---------|--------------|---------|------------|-----------|------------------|-----------------------------------------|
| Fam167b | 129578336    | T       | C          | K/E       | Aag/Gag          | Non synonymous coding                   |
| Dcdc2b  | 129608827    | G       | A          | A/V       | gCa/gTa          | Non synonymous coding                   |
| Dcdc2b  | 129609105    | G       | T          | R/S       | Cgc/Agc          | Non synonymous coding                   |
| Dcdc2b  | 129609645    | T       | TCCAGGGCTG | W/CSPG    | tgg/tgCAGCCCTGGg | Codon change + 3 amino acid insertion   |
| Dcdc2b  | 129609707    | A       | G          | F/S       | tTt/tCt          | Non synonymous coding                   |
| Dcdc2b  | 129611279    | C       | T          | A/T       | Gcc/Acc          | Non synonymous coding                   |
| Dcdc2b  | 129614068    | C       | T          | A/T       | Gct/Act          | Non synonymous coding                   |
| Dcdc2b  | 129614109    | A       | G          | V/A       | gTc/gCc          | Non synonymous coding                   |
| Iqcc    | 129616471    | C       | T          | W/Stop    | tGg/tAg          | Stop gained resulting in 2aa truncation |
| Iqcc    | 129616487    | G       | A          | R/C       | Cgt/Tgt          | Non synonymous coding                   |
| Iqcc    | 129616642    | A       | G          | L/S       | tTa/tCa          | Non synonymous coding                   |
| Iqcc    | 129616648    | T       | C          | N/S       | aAt/aGt          | Non synonymous coding                   |
| Iqcc    | 129616708    | T       | A          | Q/L       | cAa/cTa          | Non synonymous coding                   |
| Iqcc    | 129616841    | C       | T          | G/R       | Gga/Aga          | Non synonymous coding                   |
| Iqcc    | 129617753    | T       | C          | D/G       | gAt/gGt          | Non synonymous coding                   |
| Iqcc    | 129617801    | T       | A          | Q/L       | cAg/cTg          | Non synonymous coding                   |
| Ccdc28b | 129622714    | G       | T          | P/Q       | cCa/cAa          | Non synonymous coding                   |
| Tmem39b | 129684417    | T       | C          | H/R       | cAc/cGc          | Non synonymous coding                   |

Supplemental Table 3b. Sequence variations in non-coding RNAs between NOD and C57BL/6 genomes in a portion of the *Idd9.1* region, 129.495-129.808 Mb.

| Gene name    | Position m38 | C57BL/6 | NOD/ShiLtJ | Description                                 | Biotype   |
|--------------|--------------|---------|------------|---------------------------------------------|-----------|
| RP23-209C6.5 | 129509723    | T       | G          | Novel Transcript, Antisense To A Novel Gene | antisense |

Supplemental Table 3c. Consequences of SNP variations in protein-coding genes between NOD and C57BL/6 genomes in distal *Idd9.2* region.

| Gene          | Position <sup>§</sup> | C57BL/6 | NOD/ShiLtj | AA change | Codon change | Consequence           | Line 1566 <sup>§§</sup> | Line 9374 <sup>§§</sup> | Line 6353 <sup>§§</sup> |
|---------------|-----------------------|---------|------------|-----------|--------------|-----------------------|-------------------------|-------------------------|-------------------------|
| Zfp933        | 147828455             | G       | T          | A/D       | gCc/gAc      | Non synonymous coding |                         |                         |                         |
| Miip          | 147860963             | T       | A          | Q/H       | caA/caT      | Non synonymous coding |                         |                         |                         |
| Miip          | 147860995             | C       | T          | A/T       | Gcc/Acc      | Non synonymous coding |                         |                         |                         |
| Miip          | 147862304             | T       | C          | Q/R       | cAg/cGg      | Non synonymous coding |                         |                         |                         |
| Miip          | 147865860             | A       | C          | V/G       | gTc/gGc      | Non synonymous coding |                         |                         |                         |
| Miip          | 147865887             | T       | C          | D/G       | gAt/gGt      | Non synonymous coding |                         |                         |                         |
| Miip          | 147865896             | C       | A          | S/I       | aGt/aTt      | Non synonymous coding |                         |                         |                         |
| Fv1           | 147870050             | G       | A          | E/K       | Gaa/Aaa      | Non synonymous coding |                         |                         |                         |
| Fv1           | 147870173             | AG      | GT         | R/V       | aga/GTa      | Non synonymous coding |                         |                         |                         |
| Fv1           | 147870290             | ¶       | ¶¶         | ¶¶¶       |              | Frame shift           |                         |                         |                         |
| Mfn2          | 147878782             | T       | G          | E/D       | gaA/gaC      | Non synonymous coding |                         |                         |                         |
| Mfn2          | 147885688             | T       | C          | Q/R       | cAg/cGg      | Non synonymous coding |                         |                         |                         |
| Nppb          | 147986054             | T       | C          | Y/H       | Tat/Cat      | Non synonymous coding |                         |                         |                         |
| Mthfr         | 148041660             | A       | G          | S/G       | Agc/Ggc      | Non synonymous coding |                         |                         |                         |
| Agtrap        | 148080499             | A       | G          | V/A       | gTc/gCc      | Non synonymous coding |                         |                         |                         |
| 2610109H07Rik | 148112777             | T       | C          | T/A       | Aca/Gca      | Non synonymous coding |                         |                         |                         |
| 2610109H07Rik | 148115627             | G       | C          | A/G       | gCt/gGt      | Non synonymous coding |                         |                         |                         |
| 2610109H07Rik | 148115747             | G       | C          | T/S       | aCt/aGt      | Non synonymous coding |                         |                         |                         |
| Fbxo6         | 148149408             | C       | T          | R/K       | aGg/aAg      | Non synonymous coding |                         |                         |                         |
| Fbxo44        | 148153519             | G       | A          | R/W       | Cgg/Tgg      | Non synonymous coding |                         |                         |                         |
| Fbxo44        | 148153600             | G       | T          | L/M       | Ctg/Atg      | Non synonymous coding |                         |                         |                         |
| Fbxo44        | 148156185             | C       | T          | G/S       | Ggt/Agt      | Non synonymous coding |                         |                         |                         |
| Fbxo2         | 148164874             | G       | A          | R/K       | aGg/aAg      | Non synonymous coding |                         |                         |                         |
| Ptchd2        | 148249782             | G       | A          | S/L       | tCg/tTg      | Non synonymous coding |                         |                         |                         |
| Ptchd2        | 148255139             | T       | G          | T/P       | Act/Cct      | Non synonymous coding |                         |                         |                         |
| Ptchd2        | 148271825             | A       | G          | S/P       | Tcc/Ccc      | Non synonymous coding |                         |                         |                         |
| Ptchd2        | 148272323             | T       | C          | I/V       | Atc/Gtc      | Non synonymous coding |                         |                         |                         |
| Ptchd2        | 148272346             | G       | T          | P/Q       | cCg/cAg      | Non synonymous coding |                         |                         |                         |

|         |           |    |            |       |             |                             |  |  |  |
|---------|-----------|----|------------|-------|-------------|-----------------------------|--|--|--|
| Ubiad1  | 148444348 | G  | A          | L/F   | Ctt/Ttt     | Non synonymous coding       |  |  |  |
| Exosc10 | 148580410 | A  | G          | I/V   | Ata/Gta     | Non synonymous coding       |  |  |  |
| Exosc10 | 148581780 | G  | T          | C/F   | tGt/fTt     | Non synonymous coding       |  |  |  |
| Masp2   | 148603788 | G  | A          | V/I   | Gtt/Att     | Non synonymous coding       |  |  |  |
| Masp2   | 148608001 | TA | CG         | I/T   | ata/aCG     | Non synonymous coding       |  |  |  |
| Masp2   | 148612097 | G  | C          | E/Q   | Gaa/Caa     | Non synonymous coding       |  |  |  |
| Masp2   | 148614261 | G  | A          | A/T   | Gcc/Acc     | Non synonymous coding       |  |  |  |
| Gm572   | 148668500 | G  | A          | V/I   | Gtt/Att     | Non synonymous coding       |  |  |  |
| Gm572   | 148668600 | T  | C          | M/T   | aTg/aCg     | Non synonymous coding       |  |  |  |
| Gm572   | 148668600 | #  | ##         | ###   |             | Frame shift                 |  |  |  |
| Casz1   | 148929159 | A  | G          | H/R   | cAt/cGt     | Non synonymous coding       |  |  |  |
| Casz1   | 148929467 | A  | G          | T/A   | Acc/Gcc     | Non synonymous coding       |  |  |  |
| Casz1   | 148938614 | A  | G          | M/V   | Atg/Gtg     | Non synonymous coding       |  |  |  |
| Casz1   | 148939231 | T  | G          | I/M   | atT/atG     | Non synonymous coding       |  |  |  |
| Casz1   | 148939449 | G  | A          | R/H   | cGt/cAt     | Non synonymous coding       |  |  |  |
| Casz1   | 148942940 | G  | A          | S/N   | aGc/aAc     | Non synonymous coding       |  |  |  |
| Casz1   | 148944359 | T  | C          | L/P   | cTg/cCg     | Non synonymous coding       |  |  |  |
| Casz1   | 148952306 | *  | -CAG       | TA/T  | acagcc/acc  | Codon change/codon deletion |  |  |  |
| Dffa    | 149106299 | T  | C          | I/T   | aTt/aCt     | Non synonymous coding       |  |  |  |
| Cort    | 149125414 | *  | -CCACTCGTG | HEW/- | cacgagtgg/- | Codon deletion              |  |  |  |
| Apitd1  | 149128877 | C  | G          | G/R   | Gga/Cga     | Non synonymous coding       |  |  |  |
| Pgd     | 149153903 | C  | G          | G/A   | gGc/gCc     | Non synonymous coding       |  |  |  |
| Ube4b   | 149365481 | T  | A          | E/D   | gaA/gaT     | Non synonymous coding       |  |  |  |
| Nmnat1  | 149468885 | T  | C          | T/A   | Acg/Gcg     | Non synonymous coding       |  |  |  |
| Nmnat1  | 149469781 | A  | G          | Y/H   | Tac/Cac     | Non synonymous coding       |  |  |  |
| Pik3cd  | 149698454 | G  | A          |       |             | Splice site donor           |  |  |  |

§ Position in GRCm38 build.

§§ Shaded area indicate extent of B10 derived congenic region in each strain.

¶ GGCTTGACTTCTGTAGGCTCTGTGGGGGTTCTCTCTCTCTCCCTGGAAACATCAAAGCAACAGTTAA

¶¶ ACAAAACTCTGA

¶¶¶ GLTSVGSVGVLSLSPWKHQSNS/TKL

# GGGGGGTGGGTCTCTCCAGCAGCCTGTGA

## GGGTCTCTCCAGCAGCCTGTGAGCAGAGATAA

### GVGLSSSL/VSPAACEQR

Supplemental Table 3d. Sequence variations in non-coding RNAs between NOD and C57BL/6 genomes in distal *Idd9.2* region.

| Gene name    | Position m38 | C57BL/6 | NOD/ShiLtJ | Description                                    | Biotype   |
|--------------|--------------|---------|------------|------------------------------------------------|-----------|
| RP23-406N5.8 | 147807107    | G       | A          | novel transcript                               | lincRNA   |
| RP23-406N5.8 | 147807119    | *       | -T         | novel transcript                               | lincRNA   |
| RP23-406N5.8 | 147807123    | C       | A          | novel transcript                               | lincRNA   |
| RP23-406N5.8 | 147807126    | T       | A          | novel transcript                               | lincRNA   |
| RP23-406N5.8 | 147807130    | A       | G          | novel transcript                               | lincRNA   |
| RP23-406N5.8 | 147807132    | G       | T          | novel transcript                               | lincRNA   |
| RP23-406N5.8 | 147807166    | T       | G          | novel transcript                               | lincRNA   |
| RP23-406N5.8 | 147809668    | C       | G          | novel transcript                               | lincRNA   |
| RP23-406N5.8 | 147809703    | G       | C          | novel transcript                               | lincRNA   |
| RP23-406N5.8 | 147809714    | C       | A          | novel transcript                               | lincRNA   |
| RP23-406N5.8 | 147809748    | G       | A          | novel transcript                               | lincRNA   |
| RP23-406N5.8 | 147809751    | *       | -AAT       | novel transcript                               | lincRNA   |
| RP23-406N5.8 | 147809767    | C       | A          | novel transcript                               | lincRNA   |
| RP23-406N5.8 | 147809777    | A       | G          | novel transcript                               | lincRNA   |
| RP23-406N5.8 | 147809784    | T       | C          | novel transcript                               | lincRNA   |
| RP23-406N5.8 | 147809799    | T       | C          | novel transcript                               | lincRNA   |
| RP23-406N5.8 | 147809817    | A       | G          | novel transcript                               | lincRNA   |
| RP23-406N5.8 | 147809825    | G       | T          | novel transcript                               | lincRNA   |
| Gm13201      | 148071899    | T       | A          | novel transcript, antisense to Mthfr (Gm13201) | antisense |
| Gm13201      | 148071907    | A       | G          | novel transcript, antisense to Mthfr (Gm13201) | antisense |
| Gm13201      | 148073040    | C       | T          | novel transcript, antisense to Mthfr (Gm13201) | antisense |
| Gm13206      | 148306941    | G       | A          | novel transcript (Gm13206)                     | lincRNA   |
| Gm13206      | 148315938    | T       | C          | novel transcript (Gm13206)                     | lincRNA   |
| Gm13206      | 148315959    | C       | T          | novel transcript (Gm13206)                     | lincRNA   |
| Gm13206      | 148316029    | T       | C          | novel transcript (Gm13206)                     | lincRNA   |
| Gm13206      | 148316034    | G       | A          | novel transcript (Gm13206)                     | lincRNA   |
| Gm13206      | 148316059    | G       | A          | novel transcript (Gm13206)                     | lincRNA   |
| Gm13206      | 148316127    | *       | +T         | novel transcript (Gm13206)                     | lincRNA   |
| Gm13206      | 148316229    | A       | G          | novel transcript (Gm13206)                     | lincRNA   |
| Gm13206      | 148316233    | TC      | GA         | novel transcript (Gm13206)                     | lincRNA   |
| Gm13206      | 148316272    | T       | C          | novel transcript (Gm13206)                     | lincRNA   |
| Gm13206      | 148316299    | C       | T          | novel transcript (Gm13206)                     | lincRNA   |
| Gm13206      | 148316310    | A       | T          | novel transcript (Gm13206)                     | lincRNA   |
| Gm13206      | 148316320    | G       | A          | novel transcript (Gm13206)                     | lincRNA   |
| Gm13206      | 148316355    | G       | A          | novel transcript (Gm13206)                     | lincRNA   |

|               |           |    |                                                                   |                                                  |           |
|---------------|-----------|----|-------------------------------------------------------------------|--------------------------------------------------|-----------|
| Gm13206       | 148316372 | C  | T                                                                 | novel transcript (Gm13206)                       | lincRNA   |
| Gm13206       | 148316448 | A  | G                                                                 | novel transcript (Gm13206)                       | lincRNA   |
| Gm13206       | 148316464 | *  | -GGGGTTACAG                                                       | novel transcript (Gm13206)                       | lincRNA   |
| Gm13206       | 148316474 | A  | T                                                                 | novel transcript (Gm13206)                       | lincRNA   |
| Gm13206       | 148316509 | *  | -GGGCTTTCTCCTTAGCCCTAAAATTCAGACA<br>AAACTATTAACATAGATAAATTTTTTGCC | novel transcript (Gm13206)                       | lincRNA   |
| Gm13200       | 148356411 | C  | T                                                                 | novel transcript (Gm13200)                       | lincRNA   |
| Gm13200       | 148356417 | G  | A                                                                 | novel transcript (Gm13200)                       | lincRNA   |
| Gm13209       | 148585014 | C  | A                                                                 | novel transcript, antisense to Exosc10 (Gm13209) | antisense |
| Gm13209       | 148585862 | G  | C                                                                 | novel transcript, antisense to Exosc10 (Gm13209) | antisense |
| Gm13209       | 148585872 | *  | -TTCT                                                             | novel transcript, antisense to Exosc10 (Gm13209) | antisense |
| Gm13209       | 148585999 | A  | G                                                                 | novel transcript, antisense to Exosc10 (Gm13209) | antisense |
| Gm13203       | 148716277 | T  | C                                                                 | novel transcript (Gm13203)                       | lincRNA   |
| Gm13203       | 148716280 | A  | G                                                                 | novel transcript (Gm13203)                       | lincRNA   |
| Gm13203       | 148716285 | T  | C                                                                 | novel transcript (Gm13203)                       | lincRNA   |
| Gm13203       | 148716343 | T  | C                                                                 | novel transcript (Gm13203)                       | lincRNA   |
| Gm13203       | 148716391 | A  | T                                                                 | novel transcript (Gm13203)                       | lincRNA   |
| Gm13203       | 148716474 | C  | T                                                                 | novel transcript (Gm13203)                       | lincRNA   |
| Gm15969       | 148913566 | T  | C                                                                 | novel transcript, antisense to Casz1 (Gm15969)   | antisense |
| RP23-230I5.2  | 148947564 | C  | G                                                                 | novel transcript, antisense to Casz1             | antisense |
| RP23-230I5.2  | 148947601 | C  | T                                                                 | novel transcript, antisense to Casz1             | antisense |
| RP23-230I5.2  | 148947622 | C  | T                                                                 | novel transcript, antisense to Casz1             | antisense |
| RP23-230I5.2  | 148947641 | G  | A                                                                 | novel transcript, antisense to Casz1             | antisense |
| RP23-230I5.2  | 148947759 | A  | G                                                                 | novel transcript, antisense to Casz1             | antisense |
| RP23-230I5.2  | 148947832 | G  | A                                                                 | novel transcript, antisense to Casz1             | antisense |
| RP23-121D17.2 | 148961713 | A  | G                                                                 | novel transcript, antisense to Pex14             | antisense |
| RP23-121D17.2 | 148962237 | *  | +GGCTCAGA                                                         | novel transcript, antisense to Pex14             | antisense |
| RP23-121D17.2 | 148962833 | *  | +A                                                                | novel transcript, antisense to Pex14             | antisense |
| RP23-121D17.2 | 148962865 | T  | C                                                                 | novel transcript, antisense to Pex14             | antisense |
| RP23-121D17.2 | 148962885 | T  | C                                                                 | novel transcript, antisense to Pex14             | antisense |
| RP23-121D17.2 | 148962892 | G  | A                                                                 | novel transcript, antisense to Pex14             | antisense |
| RP23-121D17.2 | 148962976 | A  | G                                                                 | novel transcript, antisense to Pex14             | antisense |
| RP23-121D17.2 | 148962991 | T  | C                                                                 | novel transcript, antisense to Pex14             | antisense |
| RP23-121D17.2 | 148963215 | C  | T                                                                 | novel transcript, antisense to Pex14             | antisense |
| RP23-121D17.2 | 148963300 | T  | C                                                                 | novel transcript, antisense to Pex14             | antisense |
| RP23-121D17.2 | 148963551 | G  | T                                                                 | novel transcript, antisense to Pex14             | antisense |
| RP23-121D17.2 | 148966737 | A  | G                                                                 | novel transcript, antisense to Pex14             | antisense |
| RP23-121D17.2 | 148966809 | CA | AT                                                                | novel transcript, antisense to Pex14             | antisense |

|               |           |   |                                                 |                                                |           |
|---------------|-----------|---|-------------------------------------------------|------------------------------------------------|-----------|
| RP23-121D17.2 | 148972062 | A | G                                               | novel transcript, antisense to Pex14           | antisense |
| RP23-121D17.2 | 148982095 | A | G                                               | novel transcript, antisense to Pex14           | antisense |
| RP23-121D17.2 | 148982306 | C | T                                               | novel transcript, antisense to Pex14           | antisense |
| RP23-121D17.2 | 148982449 | A | G                                               | novel transcript, antisense to Pex14           | antisense |
| RP23-121D17.2 | 148982634 | * | +ACACA                                          | novel transcript, antisense to Pex14           | antisense |
| RP23-121D17.2 | 148982759 | * | +GAGCGAGCGAGCGAGCGAGAGAGA                       | novel transcript, antisense to Pex14           | antisense |
| RP23-121D17.2 | 148982804 | T | A                                               | novel transcript, antisense to Pex14           | antisense |
| RP23-121D17.2 | 148982913 | A | G                                               | novel transcript, antisense to Pex14           | antisense |
| RP23-121D17.2 | 148983037 | * | +T                                              | novel transcript, antisense to Pex14           | antisense |
| RP23-121D17.2 | 148983181 | A | G                                               | novel transcript, antisense to Pex14           | antisense |
| RP23-121D17.2 | 148983393 | A | G                                               | novel transcript, antisense to Pex14           | antisense |
| RP23-121D17.2 | 148983947 | A | G                                               | novel transcript, antisense to Pex14           | antisense |
| RP23-173D8.3  | 149335721 | C | T                                               | novel transcript, antisense to Ube4b           | antisense |
| RP23-173D8.3  | 149335817 | A | T                                               | novel transcript, antisense to Ube4b           | antisense |
| Gm13069       | 149338142 | C | T                                               | novel transcript, antisense to Ube4b (Gm13069) | antisense |
| Gm13069       | 149338201 | T | C                                               | novel transcript, antisense to Ube4b (Gm13069) | antisense |
| Gm13069       | 149338219 | * | -CC                                             | novel transcript, antisense to Ube4b (Gm13069) | antisense |
| Gm13069       | 149338488 | A | G                                               | novel transcript, antisense to Ube4b (Gm13069) | antisense |
| Gm13069       | 149338496 | A | G                                               | novel transcript, antisense to Ube4b (Gm13069) | antisense |
| Gm13069       | 149338521 | C | A                                               | novel transcript, antisense to Ube4b (Gm13069) | antisense |
| Gm13069       | 149338530 | * | +ATA                                            | novel transcript, antisense to Ube4b (Gm13069) | antisense |
| RP23-173D8.2  | 149347912 | T | C                                               | novel transcript, antisense to Ube4b           | antisense |
| RP23-173D8.2  | 149348036 | G | A                                               | novel transcript, antisense to Ube4b           | antisense |
| RP23-173D8.2  | 149351970 | * | -GCCACATCTCAGAGGGCCTCCT<br>GCCAGAGGAGAGGCACAGAG | novel transcript, antisense to Ube4b           | antisense |
| RP23-173D8.2  | 149352030 | G | A                                               | novel transcript, antisense to Ube4b           | antisense |
| RP23-173D8.2  | 149352045 | G | C                                               | novel transcript, antisense to Ube4b           | antisense |
| RP23-173D8.2  | 149352072 | A | G                                               | novel transcript, antisense to Ube4b           | antisense |
| RP23-173D8.2  | 149352188 | C | T                                               | novel transcript, antisense to Ube4b           | antisense |
| RP23-173D8.2  | 149352207 | C | T                                               | novel transcript, antisense to Ube4b           | antisense |
| RP23-173D8.2  | 149357592 | C | T                                               | novel transcript, antisense to Ube4b           | antisense |
| RP23-173D8.2  | 149357616 | A | G                                               | novel transcript, antisense to Ube4b           | antisense |
| RP23-173D8.2  | 149358070 | G | A                                               | novel transcript, antisense to Ube4b           | antisense |
| RP23-173D8.2  | 149358630 | A | G                                               | novel transcript, antisense to Ube4b           | antisense |
| RP23-173D8.2  | 149358740 | A | G                                               | novel transcript, antisense to Ube4b           | antisense |
| RP23-173D8.2  | 149358781 | C | T                                               | novel transcript, antisense to Ube4b           | antisense |
| RP23-173D8.2  | 149358895 | T | C                                               | novel transcript, antisense to Ube4b           | antisense |
| RP23-173D8.2  | 149359070 | G | A                                               | novel transcript, antisense to Ube4b           | antisense |

|              |           |    |      |                                                   |           |
|--------------|-----------|----|------|---------------------------------------------------|-----------|
| RP23-173D8.2 | 149359094 | A  | G    | novel transcript, antisense to Ube4b              | antisense |
| RP23-173D8.2 | 149359136 | G  | A    | novel transcript, antisense to Ube4b              | antisense |
| RP23-173D8.2 | 149359140 | C  | T    | novel transcript, antisense to Ube4b              | antisense |
| RP23-173D8.2 | 149359154 | *  | -A   | novel transcript, antisense to Ube4b              | antisense |
| RP23-173D8.2 | 149359272 | A  | G    | novel transcript, antisense to Ube4b              | antisense |
| RP23-173D8.2 | 149364842 | T  | A    | novel transcript, antisense to Ube4b              | antisense |
| RP23-173D8.2 | 149365157 | T  | C    | novel transcript, antisense to Ube4b              | antisense |
| Gm13097      | 149480459 | G  | A    | novel transcript, antisense to Nmnat1 (Gm13097)   | antisense |
| Gm13097      | 149482339 | CC | TG   | novel transcript, antisense to Nmnat1 (Gm13097)   | antisense |
| Gm13097      | 149482378 | G  | A    | novel transcript, antisense to Nmnat1 (Gm13097)   | antisense |
| Gm13097      | 149483315 | A  | G    | novel transcript, antisense to Nmnat1 (Gm13097)   | antisense |
| Gm13097      | 149483446 | *  | +CCT | novel transcript, antisense to Nmnat1 (Gm13097)   | antisense |
| Gm13097      | 149483479 | C  | T    | novel transcript, antisense to Nmnat1 (Gm13097)   | antisense |
| Gm13097      | 149483497 | A  | G    | novel transcript, antisense to Nmnat1 (Gm13097)   | antisense |
| Gm13066      | 149565709 | T  | C    | novel transcript, antisense to Ctnnbip1 (Gm13066) | antisense |
| Gm13068      | 149749429 | *  | +CTT | novel transcript, antisense to Slc25a33 (Gm13068) | antisense |
| Gm13068      | 149749583 | C  | T    | novel transcript, antisense to Slc25a33 (Gm13068) | antisense |
| Gm13073      | 149780071 | A  | G    | novel transcript (Gm13073)                        | lincrna   |
| Gm13073      | 149780119 | T  | C    | novel transcript (Gm13073)                        | lincrna   |
| Gm13073      | 149780120 | *  | -GG  | novel transcript (Gm13073)                        | lincrna   |
| Gm13073      | 149780164 | *  | -G   | novel transcript (Gm13073)                        | lincrna   |
| Gm13073      | 149780597 | T  | C    | novel transcript (Gm13073)                        | lincrna   |
