# Supplementary material for: Fine mapping of type 1 diabetes regions Idd9.1 and Idd9.2 reveals genetic complexity
Source: PubMed Central journal article supplement (PMC3824839; doi:10.1007/s00335-013-9466-y), 2013-08-11
Supplement: 335_2013_9466_MOESM4_ESM.pdf [file 335_2013_9466_MOESM4_ESM.pdf]

Supplemental Table 4a. Differentially expressed probes from the Affymetrix core probe set.

| Probe ID | Gene Symbol | Chromosome | Start position | <i>Idd9</i> region | Fold change | Magnitude fold change | Adjusted P Value | Average Expression | Mean NOD    | Mean <i>Idd9</i> |
|----------|-------------|------------|----------------|--------------------|-------------|-----------------------|------------------|--------------------|-------------|------------------|
| 6810717  | Akr1e1      | 13         | 4590767        |                    | 4.05        | 4.05                  | 1.50E-06         | 166.7450357        | 6.372666667 | 8.390333333      |
| 6918533  | Rex2        | 4          | 146964351      | 9.2                | 0.45        | 2.24                  | 0.00185219       | 97.59035504        | 7.192       | 6.025333333      |
| 6923411  | Jun         | 4          | 95049053       |                    | 0.49        | 2.05                  | 0.003658532      | 271.7871304        | 8.602666667 | 7.57             |
| 6980101  | Cd209d      | 8          | 3871825        |                    | 1.77        | 1.77                  | 0.005262629      | 117.0109715        | 6.458333333 | 7.282666667      |
| 6940358  | Plac8       | 5          | 100553733      |                    | 1.82        | 1.82                  | 0.006733638      | 256.0591554        | 7.568       | 8.432666667      |
| 6899428  | Sprr2d      | 3          | 92339140       |                    | 0.57        | 1.75                  | 0.006801842      | 196.6745765        | 8.021333333 | 7.218            |
| 6904300  | Ccna2       | 3          | 36564872       |                    | 1.75        | 1.75                  | 0.006801842      | 373.9841541        | 8.142333333 | 8.951333333      |
| 6925587  | Ccdc28b     | 4          | 129619274      | 9.1                | 1.91        | 1.91                  | 0.006801842      | 736.8191087        | 9.057333333 | 9.993            |
| 6791298  | Top2a       | 11         | 98937383       |                    | 1.92        | 1.92                  | 0.006801842      | 349.5447444        | 7.978666667 | 8.92             |
| 6998900  | Tdgf1       | 9          | 110931759      |                    | 2.09        | 2.09                  | 0.008524053      | 165.7655039        | 6.84        | 7.906            |
| 6815558  | Ccnb1       | 13         | 100778670      |                    | 1.76        | 1.76                  | 0.011304529      | 208.8755765        | 7.300666667 | 8.112333333      |
| 6957304  | Prmt8       | 6          | 127689011      |                    | 0.52        | 1.92                  | 0.011771418      | 35.79865137        | 5.633666667 | 4.69             |
| 6913499  | Smc2        | 4          | 52369442       |                    | 1.62        | 1.62                  | 0.012689761      | 282.9035885        | 7.798333333 | 8.49             |
| 6772417  | Tnfaip3     | 10         | 18860936       |                    | 0.55        | 1.82                  | 0.016027113      | 243.2562957        | 8.358       | 7.494666667      |
| 6786044  | Figl1       | 11         | 11776658       |                    | 1.54        | 1.54                  | 0.016027113      | 268.9138033        | 7.759666667 | 8.382333333      |
| 6790475  | Brip1       | 11         | 86058136       |                    | 1.61        | 1.61                  | 0.016027113      | 109.0238528        | 6.425333333 | 7.111666667      |
| 6791978  | Kpna2       | 11         | 106988649      |                    | 1.67        | 1.67                  | 0.016027113      | 206.4525842        | 7.318333333 | 8.061            |
| 6758663  | Asnsd1      | 1          | 53325517       |                    | 1.65        | 1.65                  | 0.016985449      | 243.0596607        | 7.566       | 8.284333333      |
| 6879938  | Ccdc34      | 2          | 110017837      |                    | 1.69        | 1.69                  | 0.016985449      | 178.6922597        | 7.101666667 | 7.861            |
| 6910611  | Dnajb4      | 3          | 152165501      |                    | 0.58        | 1.72                  | 0.020581596      | 365.7379866        | 8.905666667 | 8.123666667      |
| 6926082  | Rcan3       | 4          | 135412312      | 9.1                | 0.59        | 1.7                   | 0.020581596      | 179.4369674        | 7.868       | 7.106666667      |
| 6757634  | Ptp4a1      | 1          | 30940306       |                    | 0.64        | 1.57                  | 0.020581596      | 507.4657577        | 9.313666667 | 8.660666667      |
| 7017550  | Xlr3a       | X          | 73086296       |                    | 1.59        | 1.59                  | 0.020581596      | 109.4402788        | 6.439666667 | 7.108333333      |
| 6811530  | Hist1h1b    | 13         | 21779887       |                    | 1.6         | 1.6                   | 0.020581596      | 109.7314553        | 6.438       | 7.117666667      |
| 6780933  | Vdac1       | 11         | 52332877       |                    | 1.61        | 1.61                  | 0.020581596      | 318.1727932        | 7.968333333 | 8.659            |
| 7018897  | Nsbp1       | X          | 109004430      |                    | 1.61        | 1.61                  | 0.020581596      | 333.2589937        | 8.038666667 | 8.722333333      |
| 6880497  | Rad51       | 2          | 119112627      |                    | 1.65        | 1.65                  | 0.020581596      | 137.1870032        | 6.74        | 7.46             |
| 6857078  | Ndc80       | 17         | 71496105       |                    | 1.57        | 1.57                  | 0.020632235      | 190.9211781        | 7.251       | 7.902666667      |
| 6919748  | Fam92a      | 4          | 12100669       | 9.1                | 1.61        | 1.61                  | 0.022478566      | 296.2832656        | 7.868333333 | 8.553333333      |
| 6897002  | Plk4        | 3          | 40800038       |                    | 1.52        | 1.52                  | 0.02251174       | 206.5480076        | 7.386       | 7.994666667      |
| 6959568  | Polr2i      | 7          | 30231779       |                    | 1.56        | 1.56                  | 0.02251174       | 172.4458978        | 7.11        | 7.75             |
| 6960178  | Klk8        | 7          | 43797413       |                    | 1.6         | 1.6                   | 0.02251174       | 294.7470029        | 7.864333333 | 8.542333333      |

|         |               |    |           |     |      |      |             |             |             |             |
|---------|---------------|----|-----------|-----|------|------|-------------|-------------|-------------|-------------|
| 6895672 | Fabp5         | 3  | 9932449   |     | 1.59 | 1.59 | 0.02498998  | 252.5922678 | 7.645333333 | 8.316       |
| 6936981 | Tyms          | 5  | 30044475  |     | 1.62 | 1.62 | 0.02498998  | 215.3192259 | 7.401       | 8.099666667 |
| 6807022 | Cks2          | 13 | 51600235  |     | 1.65 | 1.65 | 0.02498998  | 358.915396  | 8.127666667 | 8.847333333 |
| 6925559 | Zbtb8a        | 4  | 129353633 | 9.1 | 0.64 | 1.56 | 0.025648563 | 92.95754096 | 6.858333333 | 6.218666667 |
| 6989974 | 2810417H13Rik | 9  | 65890333  |     | 1.58 | 1.58 | 0.025648563 | 282.7728895 | 7.813666667 | 8.473333333 |
| 6971227 | Nsmce1        | 7  | 125467646 |     | 1.51 | 1.51 | 0.026596871 | 373.2072839 | 8.246333333 | 8.841333333 |
| 6936082 | Dbf4          | 5  | 8396899   |     | 1.66 | 1.66 | 0.026596871 | 167.4592974 | 7.023333333 | 7.752       |
| 6980158 | Shcbp1        | 8  | 4735986   |     | 1.82 | 1.82 | 0.026612717 | 127.8079115 | 6.566666667 | 7.429       |
| 6819629 | Kcng          | 14 | 61607457  |     | 1.98 | 1.98 | 0.026612717 | 256.6811129 | 7.511       | 8.496666667 |
| 6929813 |               | 5  | 33653358  |     | 1.49 | 1.49 | 0.02719704  | 197.243416  | 7.336666667 | 7.911       |
| 6981683 | Thex1         | 8  | 35405141  |     | 1.53 | 1.53 | 0.029258196 | 413.2392081 | 8.385666667 | 8.996       |
| 6805273 | Hist1h2bj     | 13 | 22043230  |     | 1.71 | 1.71 | 0.029469826 | 440.907844  | 8.398666667 | 9.17        |
| 6971848 | Mki67         | 7  | 135689791 |     | 1.64 | 1.64 | 0.030835518 | 737.6708074 | 9.169666667 | 9.884       |
| 6854487 | Dusp1         | 17 | 26505604  |     | 0.55 | 1.81 | 0.030893942 | 451.0051196 | 9.246       | 8.388       |
| 6946778 | Mad2l1        | 6  | 66535317  |     | 1.56 | 1.56 | 0.032509875 | 372.7763869 | 8.221333333 | 8.863       |
| 6994624 | Hyls1         | 9  | 35560820  |     | 1.57 | 1.57 | 0.033036547 | 178.3416673 | 7.155       | 7.802       |
| 6832153 | Xrcc6         | 15 | 81987857  |     | 1.46 | 1.46 | 0.033213681 | 198.5924088 | 7.362       | 7.905333333 |
| 6937254 | Slbp          | 5  | 33630473  |     | 1.45 | 1.45 | 0.03502091  | 321.7210819 | 8.063       | 8.596333333 |
| 6869577 | Hells         | 19 | 38930944  |     | 1.61 | 1.61 | 0.035087935 | 241.2134706 | 7.57        | 8.258333333 |
| 6976320 | Hmgb2         | 8  | 57511596  |     | 1.68 | 1.68 | 0.035454566 | 702.9768322 | 9.081       | 9.833666667 |
| 6950125 | Clec2d        | 6  | 129112941 |     | 1.71 | 1.71 | 0.037698183 | 671.0764564 | 9.001333333 | 9.779333333 |
| 6999549 | Higd1a        | 9  | 121848563 |     | 1.55 | 1.55 | 0.039931951 | 414.5301806 | 8.377666667 | 9.013       |
| 6925254 | Cdca8         | 4  | 124917678 | 9.1 | 1.77 | 1.77 | 0.039931951 | 193.8548921 | 7.185       | 8.012666667 |
| 6798795 | Rhob          | 12 | 8497673   |     | 0.68 | 1.47 | 0.041397763 | 134.7834921 | 7.351       | 6.798       |
| 6977151 | Klf2          | 8  | 72319043  |     | 0.71 | 1.41 | 0.041397763 | 391.4904578 | 8.861333333 | 8.364333333 |
| 6835973 | Tmem65        | 15 | 58820402  |     | 1.41 | 1.41 | 0.041397763 | 152.9412047 | 7.008333333 | 7.505333333 |
| 6844362 | Mrpl40        | 16 | 18872037  |     | 1.42 | 1.42 | 0.041397763 | 250.0662705 | 7.711       | 8.221333333 |
| 6887520 | Spc25         | 2  | 69193907  |     | 1.44 | 1.44 | 0.041397763 | 161.6989686 | 7.072666667 | 7.601666667 |
| 6830165 | Ebag9         | 15 | 44619164  |     | 1.45 | 1.45 | 0.041397763 | 299.9683892 | 7.958333333 | 8.499       |
| 6878053 | Cdca7         | 2  | 72476203  |     | 1.46 | 1.46 | 0.041397763 | 203.0230892 | 7.394666667 | 7.936333333 |
| 6755378 | Kmo           | 1  | 175620401 |     | 1.5  | 1.5  | 0.041397763 | 133.7288257 | 6.772       | 7.354333333 |
| 6927456 | Cnga1         | 5  | 72603716  |     | 1.51 | 1.51 | 0.041397763 | 160.6191389 | 7.029333333 | 7.625666667 |
| 6869503 | Kif11         | 19 | 37376124  |     | 1.54 | 1.54 | 0.041397763 | 156.5883784 | 6.981666667 | 7.6         |
| 6880468 | D2Ertd750e    | 2  | 118813988 |     | 1.56 | 1.56 | 0.041397763 | 168.3904682 | 7.075666667 | 7.715666667 |
| 6960834 | Siglech       | 7  | 55732854  |     | 1.65 | 1.65 | 0.041397763 | 172.226898  | 7.068333333 | 7.788       |
| 6815870 | Ndufaf2       | 13 | 108002725 |     | 1.45 | 1.45 | 0.042439102 | 476.8857951 | 8.627333333 | 9.167666667 |

|         |               |    |           |     |      |      |             |             |             |             |
|---------|---------------|----|-----------|-----|------|------|-------------|-------------|-------------|-------------|
| 6922528 | Stmn1         | 4  | 69925210  |     | 1.43 | 1.43 | 0.042851694 | 880.7975628 | 9.527       | 10.03833333 |
| 6805245 | Hist1h2bn     | 13 | 21754123  |     | 1.47 | 1.47 | 0.042851694 | 453.5653647 | 8.545       | 9.105333333 |
| 6901592 | Cenpe         | 3  | 135212557 |     | 1.51 | 1.51 | 0.043934082 | 140.7346079 | 6.839666667 | 7.434       |
| 6941344 | Cit           | 5  | 116006776 |     | 1.46 | 1.46 | 0.044080768 | 241.2134706 | 7.639666667 | 8.188666667 |
| 6811762 | Gmn           | 13 | 24751848  |     | 1.45 | 1.45 | 0.044479327 | 258.6456887 | 7.749       | 8.280666667 |
| 6953443 | Igf2bp3       | 6  | 49085223  |     | 1.41 | 1.41 | 0.045705669 | 118.425285  | 6.639333333 | 7.136333333 |
| 6894180 | Cables2       | 2  | 180258549 |     | 1.46 | 1.46 | 0.045705669 | 143.3435653 | 6.89        | 7.436666667 |
| 6917045 | Inpp5b        | 4  | 124741870 | 9.1 | 1.51 | 1.51 | 0.045705669 | 395.1253689 | 8.328333333 | 8.924       |
| 6873282 | Ndufb8        | 19 | 44548582  |     | 1.53 | 1.53 | 0.048657011 | 455.0874528 | 8.525333333 | 9.134666667 |
| 6957731 | E330021D16Rik | 6  | 136400315 |     | 1.4  | 1.4  | 0.04978776  | 53.62498126 | 5.501       | 5.988666667 |
| 6861880 | Stard6        | 18 | 70472474  |     | 1.4  | 1.4  | 0.04978776  | 92.05983808 | 6.282       | 6.767       |
| 6970635 | Rras2         | 7  | 114044676 |     | 1.48 | 1.48 | 0.04978776  | 275.3901853 | 7.820666667 | 8.39        |

Supplemental Table 4b: Differentially expressed probes from the Affymetrix extended probe set.

| Probe ID | Gene Symbol        | Chromosome/Probe location | <i>Idd9</i> region | Fold change | Magnitude Fold Change | Adjusted P value | Average Expression | Mean NOD | Mean <i>Idd9</i> |
|----------|--------------------|---------------------------|--------------------|-------------|-----------------------|------------------|--------------------|----------|------------------|
| 6918433  |                    | chr4:144423416-144423701  |                    | 0.122116778 | 8.188882951           | 1.05E-08         | 238.9944546        | 9.418    | 6.384            |
| 6867232  |                    | chr18:85140066-85140672   |                    | 0.173860246 | 5.751746131           | 1.37E-08         | 181.6477896        | 8.767    | 6.243            |
| 6926806  | 1700029101Rik      | chr4:147625873-147676053  | 9.2                | 0.154534408 | 6.471050787           | 1.37E-08         | 151.4467351        | 8.589    | 6.080            |
| 6808990  |                    | chr13:93198975-93199718   |                    | 5.718618511 | 5.718618511           | 5.42E-07         | 132.28448          | 5.789    | 8.305            |
| 7007305  |                    | chr4:145796614-145796815  | 9.2                | 3.951316288 | 3.951316288           | 5.48E-07         | 295.2582034        | 7.215    | 9.197            |
| 6810717  | Akr1e1             | chr13:4590767-4609179     |                    | 3.73126976  | 3.73126976            | 1.35E-06         | 157.7139722        | 6.351    | 8.251            |
| 7008719  | OTTMUSG00000011027 | chr4:145538644-145539242  | 9.2                | 0.283024726 | 3.533260206           | 2.02E-06         | 95.88057572        | 7.493    | 5.672            |
| 6918564  |                    | chr4:147167701-147168321  | 9.2                | 3.248258992 | 3.248258992           | 8.20E-06         | 273.0144182        | 7.243    | 8.943            |
| 6918571  |                    | chr4:147186533-147187245  | 9.2                | 3.750284386 | 3.750284386           | 1.80E-05         | 194.6627908        | 6.651    | 8.558            |
| 6758507  |                    | chr1:48731997-48796216    |                    | 4.007400407 | 4.007400407           | 2.25E-05         | 139.8109293        | 6.126    | 8.129            |
| 6918458  |                    | chr4:145817102-145817724  | 9.2                | 2.928171392 | 2.928171392           | 4.41E-05         | 278.4613589        | 7.346    | 8.896            |
| 7001443  |                    | chr13:68436661-68437226   |                    | 0.356506429 | 2.804998501           | 4.41E-05         | 159.4175517        | 8.060    | 6.572            |
| 6867440  |                    | chr18:6147086-6147327     |                    | 5.258555916 | 5.258555916           | 4.81E-05         | 139.7463379        | 5.929    | 8.324            |
| 6895778  | OTTMUSG00000010173 | chr3:12744194-12873679    |                    | 0.363073448 | 2.754263649           | 5.86E-05         | 129.0840257        | 7.743    | 6.281            |
| 6925576  |                    | chr4:129563018-129563645  | 9.1                | 3.400310911 | 3.400310911           | 5.86E-05         | 422.6051876        | 7.840    | 9.606            |
| 6926693  | 1700095A21Rik      | chr4:145681984-145711927  | 9.2                | 0.368652471 | 2.712581843           | 5.97E-05         | 97.96310976        | 7.334    | 5.894            |
| 7020895  | G530011O06Rik      | chrX:169974421-169975877  |                    | 0.37310838  | 2.680186388           | 7.54E-05         | 227.9910425        | 8.544    | 7.122            |
| 6777345  |                    | chr10:117683535-117684293 |                    | 2.964249054 | 2.964249054           | 9.16E-05         | 192.2491399        | 6.803    | 8.371            |
| 6910291  | Rpl11              | chr3:146838811-146844392  |                    | 0.374663325 | 2.669062953           | 9.51E-05         | 1629.07051         | 11.378   | 9.961            |
| 6918408  | OTTMUSG00000011027 | chr4:145538644-145539242  | 9.2                | 0.342854097 | 2.916692579           | 9.51E-05         | 89.58384393        | 7.257    | 5.713            |
| 7008721  | OTTMUSG00000010173 | chr19:9273804-9273855     | 9.2                | 0.342616531 | 2.918714977           | 9.51E-05         | 120.1200636        | 7.681    | 6.136            |
| 6973711  |                    | chr8:3871834-3872208      |                    | 2.531513188 | 2.531513188           | 9.51E-05         | 116.2429975        | 6.191    | 7.531            |
| 7017793  |                    | chrX:78047563-78048459    |                    | 0.388413881 | 2.574573279           | 9.51E-05         | 135.0016597        | 7.759    | 6.395            |
| 6918463  |                    | chr4:145831995-145832501  | 9.2                | 2.936301272 | 2.936301272           | 0.000118855      | 127.2039799        | 6.214    | 7.768            |
| 6847427  |                    | chr16:82207684-82210722   |                    | 2.624422509 | 2.624422509           | 0.000118855      | 272.9828802        | 7.397    | 8.789            |
| 6918537  |                    | chr4:146976318-146976901  | 9.2                | 0.353880294 | 2.825814311           | 0.000174575      | 121.1513497        | 7.67     | 6.171            |
| 6918568  |                    | chr4:146976318-146976901  | 9.2                | 2.511704368 | 2.511704368           | 0.000174575      | 128.3553838        | 6.340    | 7.668            |
| 6918447  |                    | chr4:145743883-145744434  | 9.2                | 0.397033689 | 2.518677954           | 0.000198463      | 82.46252126        | 5.699    | 6.618            |
| 6926070  |                    | chr4:135180700-135181264  |                    | 0.375964062 | 2.659828696           | 0.000198463      | 188.2274638        | 8.262    | 6.851            |
| 6799279  |                    | chr12:17547157-17547735   |                    | 0.405376211 | 2.466844312           | 0.000212928      | 347.1302625        | 9.091    | 7.788            |
| 6808991  |                    | chr13:93201706-93202701   |                    | 2.982798801 | 2.982798801           | 0.00021527       | 180.643308         | 6.709    | 8.285            |
| 6926836  |                    | chr4:147755991-147756235  | 9.2                | 0.360982299 | 2.770218936           | 0.000265943      | 704.765748         | 10.196   | 8.726            |
| 6981791  |                    | chr8:37384292-37390042    |                    | 2.726405215 | 2.726405215           | 0.000276561      | 247.8230669        | 8.677    | 7.938            |

|         |      |                           |     |             |             |             |             |       |       |
|---------|------|---------------------------|-----|-------------|-------------|-------------|-------------|-------|-------|
| 6918436 |      | chr4:145687617-145688045  | 9.2 | 0.423372656 | 2.361985323 | 0.000367484 | 77.15387258 | 5.650 | 6.939 |
| 6917875 |      | chr4:137014517-137015129  |     | 2.323554257 | 2.323554257 | 0.000481516 | 199.7197691 | 7.033 | 8.25  |
| 6855140 |      | chr17:35870814-35871298   |     | 2.30910429  | 2.30910429  | 0.00096833  | 182.4469639 | 6.908 | 8.115 |
| 6771025 |      | chr10:117657170-117657495 |     | 2.225814454 | 2.225814454 | 0.001086578 | 93.10800687 | 7.118 | 5.964 |
| 6918533 | Rex2 | chr4:146964351-147423406  | 9.2 | 0.426022048 | 2.347296357 | 0.001253138 | 119.0562873 | 6.28  | 7.511 |
| 6918519 |      | chr4:146164014-146164514  | 9.2 | 0.450417046 | 2.220164641 | 0.001284496 | 116.7274452 | 7.442 | 6.292 |
| 6749408 |      | chr1:52177473-52178087    |     | 0.469218998 | 2.131201003 | 0.001592389 | 255.3796929 | 8.542 | 7.451 |
| 7000988 | Mid1 | chr16:36364212-36364313   |     | 0.247929183 | 4.03340982  | 0.001856703 | 85.52850001 | 7.424 | 5.412 |
| 6918455 |      | chr4:145794038-145794531  | 9.2 | 2.570412675 | 2.570412675 | 0.001856921 | 130.6291746 | 6.348 | 7.710 |
| 6771024 | Cpm  | chr10:117655572-117687352 |     | 2.133664486 | 2.133664486 | 0.001885809 | 125.51071   | 6.425 | 7.518 |
| 6754684 |      | chr1:164083959-164084166  |     | 0.424155939 | 2.357623479 | 0.001885809 | 99.2962044  | 7.252 | 6.015 |
| 6749585 |      | chr1:55523081-55523236    |     | 0.410750243 | 2.434569467 | 0.001998059 | 73.93403091 | 6.85  | 5.566 |
| 6802804 |      | chr12:93541831-93542000   |     | 2.229417273 | 2.229417273 | 0.002364338 | 116.7813972 | 6.289 | 7.446 |
| 6760745 |      | chr1:92925334-92925735    |     | 0.486439852 | 2.055752619 | 0.003585444 | 250.4131764 | 8.488 | 7.448 |
| 6918644 |      | chr4:147480240-147480736  | 9.2 | 0.463294031 | 2.158456473 | 0.003971405 | 229.9750168 | 8.400 | 7.290 |
| 6926027 |      | chr4:134741574-134742232  | 9.1 | 0.469869925 | 2.128248578 | 0.003971405 | 105.5049346 | 7.266 | 6.176 |
| 6923411 | Jun  | chr4:95049053-95055499    |     | 0.490162946 | 2.040137892 | 0.004222109 | 272.2270592 | 8.603 | 7.574 |
| 6871550 |      | chr19:11448114-11448659   |     | 2.278366754 | 2.278366754 | 0.004600774 | 554.3551253 | 8.521 | 9.709 |
